# Supplementary material for: Mapping socio-geographical disparities in the occurrence of teenage maternity in Colombia using multilevel analysis of individual heterogeneity and discriminatory accuracy (MAIHDA)
Source: Springer Nature journal article supplement (doi:10.1186/s12939-024-02123-5), 2024-02-23
Supplement: MOESM1 [file 26772540]

\*\*\*\*\*

\* MANUSCRIPT Mapping socio-geographical disparities in the occurrence of teenage maternity in Colombia

//using multilevel analysis of individual heterogeneity and discriminatory accuracy (MAIHDA)

\*\*\*\*\*

version 14

clear \*

set cformat %9.3f

\*\*\*\*\*

\* (1) PREPARE THE DATA

\*\*\*\*\*

\* Directory

cd "Y:\manuscripts-2-in-progress"

\* Load the collapsed data

use "teentoc.dta", clear

\* Order variables

order departo inter id insurance livingarea region etnia matage

\* Recode inter as there is a gap at 1 in the integer sequence from 0 to 60

distinct inter

```
assert r(ndistinct) == 60
```

```
summarize inter
```

```
assert r(min) == 0
```

```
assert r(max) == 60
```

```
assert inter != 1
```

```
recode inter (0 = 1)
```

```
distinct inter
```

```
assert r(ndistinct) == 60
```

```
summarize inter
```

```
assert r(min) == 1
```

```
assert r(max) == 60
```

```
* Label variables
```

```
label var inter "Intersectional stratum"
```

```
* Attach value label on insurance
```

```
tabulate insurance, missing
```

```
describe insurance
```

```
label list insurance
```

```
label define insurance ///
```

```
0 "Contributive" ///
```

```
1 "Subsidized/No affiliation" ///
```

```
, replace
```

```
label values insurance insurance
```

```
tabulate insurance, missing
```

```
* Attach value label on livingarea
```

```
tabulate livingarea, missing
```

```
describe livingarea
```

```
label list livingarea
label define livingarea ///
  0 "Urban" ///
  1 "Rural" ///
, replace
label values livingarea livingarea
tabulate livingarea, missing
```

\* Attach value label on etnia

```
tabulate etnia, missing
```

```
describe etnia
```

```
label list etnia
```

```
label define etnia ///
```

```
  0 "Mestizo" ///
```

```
  1 "Indigenous" ///
```

```
  2 "Afro-Colombian/Romani" ///
```

```
, replace
```

```
label values etnia etnia
```

```
tabulate etnia, missing
```

\* Compress the data

```
compress
```

\* Save the data

```
save "teentoc_clean.dta", replace
```

\*-----

\* Collapse the data down to the stratum level and save

\*-----

\* Load the data

use "teentoc\_clean.dta", replace

\* Collapse the data down to one observation per stratum

collapse (sum) y = matage (count) n = matage (mean) p = matage, by(inter insurance livingarea region etnia)

\* Format the variables

format %3.2f p

\* Compress the data

compress

\* Save the data

save "teentoc\_clean\_inter.dta", replace

\*-----

\* Collapse the data down to the department level and save

\*-----

\* Load the data

use "teentoc\_clean.dta", replace

\* Collapse the data down to one observation per department

collapse (sum) y = matage (count) n = matage (mean) p = matage, by(departo)

\* Format the variables

```
format %3.2f p
```

\* Compress the data

```
compress
```

\* Save the data

```
save "teentoc_clean_departo.dta", replace
```

\*-----

\* Collapse the data down to the department-by-stratum level and save

\*-----

\* Load the data

```
use "teentoc_clean.dta", replace
```

\* Collapse the data down to one observation per stratum

```
collapse (sum) y = matage (count) n = matage (mean) p = matage, by(departo inter insurance  
livingarea region etnia)
```

\* Format the variables

```
format %3.2f p
```

\* Compress the data

```
compress
```

\* Save the data

```
save "teentoc_clean_departo_inter.dta", replace
```

\*\*\*\*\*

\* (2) DESCRIPTIVE STATISTICS

\*\*\*\*\*

\* Load the data

use "teentoc\_clean.dta", clear

\*-----

\* Univariate descriptive statistics for mother characteristics

\*-----

\* Tabulate the dependent variable

proportion matage

\* Tabulate departments

tabulate departo

\* Tabulate strata

tabulate inter

\* Tabulate each explanatory variable

tabulate insurance

tabulate livingarea

tabulate region

tabulate etnia

\*-----

\* Bivariate descriptive statistics for mother characteristics

\*-----

proportion matage, over(departo)

proportion matage, over(inter)

tabulate departo matage, col chi2

tabulate insurance matage, col chi2

tabulate livingarea matage, col chi2

tabulate region matage, col chi2

tabulate etnia matage, col chi2

\* Univariate Poisson regression

xi: poisson matage i.departo, vce(robust) irr difficult

xi: poisson matage i.insurance, vce(robust) irr difficult

xi: poisson matage i.livingarea, vce(robust) irr difficult

xi: poisson matage i.etnia, vce(robust) irr difficult

xi: poisson matage i.region, vce(robust) irr difficult

xi: poisson matage i.inter, vce(robust) irr difficult

\* Multiple Poisson regression

xi: poisson matage i.insurance i.livingarea i.etnia i.region, vce(robust) irr difficult

\*-----

\* Figure of mother characteristic rates

\*-----

\* Save stratum variable specific datasets storing the proportion in each category

foreach var in insurance livingarea region etnia {

```
use "teentoc_clean.dta", clear
replace matage = 100*matage
collapse (mean) matage, by(`var')
format %9.2f matage
generate variable = "`var'"
order variable
decode `var', generate(category)
order category, after(variable)
drop `var'
compress
save "`var'.dta", replace
}
```

```
clear
generate varorder = .
append using "insurance.dta"
replace varorder = 1 if varorder == .
append using "livingarea.dta"
replace varorder = 2 if varorder == .
append using "region.dta"
replace varorder = 3 if varorder == .
append using "etnia.dta"
replace varorder = 4 if varorder == .
label define varorder ///
    1 "Insurance" ///
    2 "Living area" ///
    3 "Region" ///
    4 "Ethnicity"
label values varorder varorder
```



```

graph bar (asis) matage, ///
    over(category, sort(matage) label(labcolor("black") angle(vertical) labsize(*.7))) ///
    over(varorder, label(labsize(*.8))) ///
    nofill ///
    bar(1, fcolor(black) lcolor(black)) ///
    xlabel(bar, size(tiny) format(%3.0f)) ///
    ylabel("Teenage pregnancy rate (%)") ///
    ylabel(0(5)30, angle(horizontal) format(%3.0f) nogrid gcolor()) ///
    scheme(s1mono)

```

\* Export graph

```

graph save "Figure2.gph", replace
graph export "Figure2.png", replace width(1000)

```

\*-----

\* Figure of stratum rates

\*-----

\* Load the data

```

use "teentoc_clean.dta", clear

```

\* Multiple matage by 100 so that plot shows as percent

```

replace matage = 100 * matage

```

\* Plot figure

```

graph bar (mean) matage, ///
    over(inter, sort(matage) label(labcolor("black") angle(vertical) labsize(*.5))) ///
    bar(1, fcolor(black) lcolor(black)) ///

```

```
blabel(bar, size(tiny) format(%3.0f)) ///
ytitle("Teenage pregnancy rate (%)") ///
ylabel(0(5)30, angle(horizontal) format(%3.0f) nogrid gcolor()) ///
scheme(s1mono) ///
b1title("Intersectional stratum")
```

\* Export graph

```
graph save "Figure3.gph", replace
graph export "Figure3.png", replace width(1000)
```

\*-----

\* Figure of department rates

\*-----

\* Load the data

```
use "teentoc_clean.dta", clear
```

\* Multiple matage by 100 so that plot shows as percent

```
replace matage = 100 * matage
```

\* Calculate the mean of matage

```
summarize matage
```

\* Plot figure

```
graph bar (mean) matage, ///
    over(region, sort(matage) label(angle(ninety))) ///
    over(departo, sort(matage) label(angle(ninety) labsize(*.7))) nofill asyvars ///
    bar(1, fcolor(gs15) lcolor(none)) ///
```

```

bar(2, fcolor(gs6) lcolor(none)) ///
bar(3, fcolor(gs12) lcolor(none)) ///
bar(4, fcolor(black) lcolor(none)) ///
bar(5, fcolor(gs13) lcolor(none)) ///
xlabel(bar, size(vsmall) format(%3.0f)) ///
ytitle("`Teenage pregnancy rate (%)`") ///
yline(18.30105) ///
ylabel(0(5)30, angle(horizontal) format(%3.0f) nogrid) ///
legend(rows(1) size(*.7) position(6) span) ///
scheme(s1mono)

```

\* Export graph

```
graph save "Figure4.gph", replace
```

```
graph export "Figure4.png", replace width(1000)
```

\*\*\*\*\*

\* (1) MAIHDA Intersectional

\*\*\*\*\*

\*-----

\* Model 1 null

\*-----

\* Load the stratum level data

```
use "teentoc_clean_inter.dta", clear
```

\* Fit the model

```
mepoisson y, exposure(n) || inter:, vce(robust) irr
```

\* Store the estimation results

estimates store m1

\* Display information criteria

estat ic

\* Predict the number of teenage mothers

predict m1n, mu

generate m1ir = m1n/n

\* Calculate the ROC

expand 2

bysort inter: generate y01 = \_n - 1

assert inlist(y01, 0, 1)

generate int n01 = .

replace n01 = n - y if y01 == 0

replace n01 = y if y01 == 1

roctab y01 m1ir [fweight = n01], summary graph

drop y01 n01

duplicates drop

\* Calculate the VPC (via Leckie et al. 2020 method)

predict m1xbhat, xb

replace m1xbhat = m1xbhat - ln(n)

scalar m1sigma2u = \_b[var(\_cons[inter]):\_cons]

generate m1mu = exp(m1xbhat + m1sigma2u/2)

generate m1vpc = ((m1mu^2) \* (exp(m1sigma2u) - 1)) / ((m1mu^2) \* (exp(m1sigma2u) - 1) + m1mu)

```
summarize m1vpc [fweight = n]
```

```
* Calculate the VPC (via the latent response formulation of melogit)
```

```
meqrlogit y || inter:, binomial(n)
```

```
scalar m1logitsigma2u = exp(_b[lns1_1_1:_cons])^2
```

```
estat icc
```

```
*-----
```

```
* Partial Model 2
```

```
*-----
```

```
* Fit the model
```

```
mepoisson y i.insurance, exposure(n) || inter:, vce(robust) irr
```

```
* Store the estimation results
```

```
estimates store m2
```

```
* Display information criteria
```

```
estat ic
```

```
* Predict the number of teenage mothers
```

```
predict m2n, mu
```

```
generate m2ir = m2n/n
```

```
* Calculate the ROC
```

```
expand 2
```

```
bysort inter: generate y01 = _n - 1
```

```
generate int n01 = .
```

```
replace n01 = n - y if y01 == 0
```

```
replace n01 = y if y01 == 1
```

```
roctab y01 m2ir [fweight = n01], summary graph
```

```
drop y01 n01
```

```
duplicates drop
```

```
* Calculate the VPC (via Leckie et al. 2020 method)
```

```
predict m2xbhat, xb
```

```
replace m2xbhat = m2xbhat - ln(n)
```

```
scalar m2sigma2u = _b[var(_cons[inter]):_cons]
```

```
generate m2mu = exp(m2xbhat + m2sigma2u/2)
```

```
generate m2vpc = ((m2mu^2) * (exp(m2sigma2u) - 1)) / ((m2mu^2) * (exp(m2sigma2u) - 1) + m2mu)
```

```
summarize m2vpc [fweight = n]
```

```
* Calculate the PCV (for the Poisson versions of the model)
```

```
display "PCV = " %3.2f 100*(m2sigma2u - m1sigma2u)/m1sigma2u
```

```
* Calculate the VPC (via the latent response formulation of melogit)
```

```
meqrlogit y i.insurance || inter:, binomial(n)
```

```
scalar m2logitsigma2u = exp(_b[lns1_1_1:_cons])^2
```

```
estat icc
```

```
* Calculate the PCV (for the logistic versions of the model)
```

```
display "PCV = " %3.2f 100*(m2logitsigma2u - m1logitsigma2u) / m1logitsigma2u
```

```
*-----
```

```
* Partial Model 3
```

\*-----

\* Load the stratum level data

use "teentoc\_clean\_inter.dta", clear

\* Fit the model

mepoisson y i.livingarea, exposure(n) || inter:, vce(robust) irr

\* Store the estimation results

estimates store m3

\* Display information criteria

estat ic

\* Predict the number of teenage mothers

predict m3n, mu

generate m3ir = m3n/n

\* Calculate the ROC

expand 2

bysort inter: generate y01 = \_n - 1

generate int n01 = .

replace n01 = n - y if y01 == 0

replace n01 = y if y01 == 1

roctab y01 m3ir [fweight = n01], summary graph

drop y01 n01

duplicates drop

\* Calculate the VPC (via Leckie et al. 2020 method)

predict m3xbhat, xb

replace m3xbhat = m3xbhat - ln(n)

scalar m3sigma2u = \_b[var(\_cons[inter]):\_cons]

generate m3mu = exp(m3xbhat + m3sigma2u/2)

generate m3vpc = ((m3mu^2) \* (exp(m3sigma2u) - 1)) / ((m3mu^2) \* (exp(m3sigma2u) - 1) + m3mu)

summarize m3vpc [fweight = n]

\* Calculate the PCV (for the Poisson versions of the model)

display "PCV = " %3.2f 100\*(m3sigma2u - m1sigma2u)/m1sigma2u

\* Calculate the VPC (via the latent response formulation of melogit)

meqrlogit y i.livingarea || inter:, binomial(n)

scalar m3logitsigma2u = exp(\_b[lns1\_1\_1:\_cons])^2

estat icc

\* Calculate the PCV (for the logistic versions of the model)

display "PCV = " %3.2f 100\*(m3logitsigma2u - m1logitsigma2u) / m1logitsigma2u

\*-----

\* Partial Model 4

\*-----

\* Load the stratum level data

use "teentoc\_clean\_inter.dta", clear

\* Fit the model



```
mepoisson y i.region, exposure(n) || inter:, vce(robust) irr
```

```
* Store the estimation results
```

```
estimates store m4
```

```
* Display information criteria
```

```
estat ic
```

```
* Predict the number of teenage mothers
```

```
predict m4n, mu
```

```
generate m4ir = m4n/n
```

```
* Calculate the ROC
```

```
expand 2
```

```
bysort inter: generate y01 = _n - 1
```

```
generate int n01 = .
```

```
replace n01 = n - y if y01 == 0
```

```
replace n01 = y if y01 == 1
```

```
roctab y01 m4ir [fweight = n01], summary graph
```

```
duplicates drop
```

```
drop y01 n01
```

```
* Calculate the VPC (via Leckie et al. 2020 method)
```

```
predict m4xbhat, xb
```

```
replace m4xbhat = m4xbhat - ln(n)
```

```
scalar m4sigma2u = _b[var(_cons[inter]):_cons]
```

```
generate m4mu = exp(m4xbhat + m4sigma2u/2)
```

```
generate m4vpc = ((m4mu^2) * (exp(m4sigma2u) - 1)) / ((m4mu^2) * (exp(m4sigma2u) - 1) + m4mu)
```

```
summarize m4vpc [fweight = n]
```

```
* Calculate the PCV (for the Poisson versions of the model)
```

```
display "PCV = " %3.2f 100*(m4sigma2u - m1sigma2u)/m1sigma2u
```

```
* Calculate the VPC (via the latent response formulation of melogit)
```

```
meqrlogit y i.region || inter:, binomial(n)
```

```
scalar m4logitsigma2u = exp(_b[lns1_1_1:_cons])^2
```

```
estat icc
```

```
* Calculate the PCV (for the logistic versions of the model)
```

```
display "PCV = " %3.2f 100*(m4logitsigma2u - m1logitsigma2u) / m1logitsigma2u
```

```
*-----
```

```
* Partial Model 5
```

```
*-----
```

```
* Fit the model
```

```
mepoisson y i.etnia, exposure(n) || inter:, vce(robust) irr
```

```
* Store the estimation results
```

```
estimates store m5
```

```
* Display information criteria
```

```
estat ic
```

```
* Predict the number of teenage mothers
```

```
predict m5n, mu
```

generate m5ir = m5n/n

\* Calculate the ROC

expand 2

bysort inter: generate y01 = \_n - 1

generate int n01 = .

replace n01 = n - y if y01 == 0

replace n01 = y if y01 == 1

roctab y01 m5ir [fweight = n01], summary graph

drop y01 n01

duplicates drop

\* Calculate the VPC (via Leckie et al. 2020 method)

predict m5xbhat, xb

replace m5xbhat = m5xbhat - ln(n)

scalar m5sigma2u = \_b[var(\_cons[inter]):\_cons]

generate m5mu = exp(m5xbhat + m5sigma2u/2)

generate m5vpc = ((m5mu^2) \* (exp(m5sigma2u) - 1)) / ((m5mu^2) \* (exp(m5sigma2u) - 1) + m5mu)

summarize m5vpc [fweight = n]

\* Calculate the PCV (for the Poisson versions of the model)

display "PCV = " %3.2f 100\*(m5sigma2u - m1sigma2u)/m1sigma2u

\* Calculate the VPC (via the latent response formulation of melogit)

meqrlogit y i.etnia || inter:, binomial(n)

scalar m5logitsigma2u = exp(\_b[lns1\_1\_1:\_cons])^2

estat icc

\* Calculate the PCV (for the logistic versions of the model)

```
display "PCV = " %3.2f 100*(m5logitsigma2u - m1logitsigma2u) / m1logitsigma2u
```

\*-----

\* Intersectional Full Model 6

\*-----

\* Load the stratum level data

```
use "teentoc_clean_inter.dta", clear
```

\* Fit the model

```
mepoisson y i.insurance i.livingarea i.region i.etnia, exposure(n) || inter:, vce(robust) irr
```

\* Store the estimation results

```
estimates store m6
```

\* Display information criteria

```
estat ic
```

\* Predict the number of teenage mothers

```
predict m6n, mu
```

```
generate m6ir = m6n/n
```

\* Calculate the ROC

```
expand 2
```

```
bysort inter: generate y01 = _n - 1
```

```
assert inlist(y01, 0, 1)
```

```
generate int n01 = .
```

```
replace n01 = n - y if y01 == 0
```

```
replace n01 = y if y01 == 1
```

```
roctab y01 m6ir [fweight = n01], summary graph
```

```
drop y01 n01
```

```
duplicates drop
```

```
* Calculate the VPC (via Leckie et al. 2020 method)
```

```
predict m6xbhat, xb
```

```
replace m6xbhat = m6xbhat - ln(n)
```

```
scalar m6sigma2u = _b[var(_cons[inter]):_cons]
```

```
generate m6mu = exp(m6xbhat + m6sigma2u/2)
```

```
generate m6vpc = ((m6mu^2) * (exp(m6sigma2u) - 1)) / ((m6mu^2) * (exp(m6sigma2u) - 1) + m6mu)
```

```
summarize m6vpc [fweight = n]
```

```
* Calculate the PCV (for the Poisson versions of the model)
```

```
display "PCV = " %3.2f 100*(m6sigma2u - m1sigma2u)/m1sigma2u
```

```
* Calculate the VPC (via the latent response formulation of melogit)
```

```
meqrlogit y i.insurance i.livingarea i.region i.etnia | | inter:, binomial(n)
```

```
scalar m6logitsigma2u = exp(_b[lns1_1_1:_cons])^2
```

```
estat icc
```

```
* Calculate the PCV (for the logistic versions of the model)
```

```
display "PCV = " %3.2f 100*(m6logitsigma2u - m1logitsigma2u) / m1logitsigma2u
```

```
*-----
```

```
* Figure of interaction
```

\*-----

```
use "teentoc_clean_inter.dta", clear
mepoisson y i.insurance i.livingarea i.region i.etnia, exposure(n) || inter:, vce(robust) irr
predict m6u, reffects reses(m6use)
keep inter m6u m6use
duplicates drop
generate m6lo = m6u - 1.96*m6use
generate m6hi = m6u + 1.96*m6use
```

```
twoway ///
    (scatter m6u inter, mcolor(black)) ///
    (pcspike m6hi inter m6lo inter, lcolor(black)) ///
    , ///
    ytitle("Predicted random effect") ///
    yline(0) ///
    ylabel(-.6(.2).6, angle(horizontal) format(%2.1f)) ///
    xlabel(1(1)60, lsize(vsmall) angle(ninety)) ///
    legend(off) ///
    scheme(s1mono)
```

```
* Export graph
graph save "Figure5.gph", replace
graph export "Figure5.png", replace width(1000)
```

\*\*\*\*\*

\* (2) MAIHDA Geographical

\*\*\*\*\*

\*-----

\* Null Model 7

\*-----

\* Load the department level data

use "teentoc\_clean\_departo.dta", clear

\* Fit the model

mepoisson y, exposure(n) || departo:, vce(robust) irr

\* Store the estimation results

estimates store m7

\* Display information criteria

estat ic

\* Predict the number of teenage mothers

predict m7n, mu

generate m7ir = m7n/n

\* Calculate the ROC

expand 2

bysort departo: generate y01 = \_n - 1

assert inlist(y01, 0, 1)

generate int n01 = .

replace n01 = n - y if y01 == 0

replace n01 = y if y01 == 1

```
roctab y01 m7ir [fweight = n01], summary graph
```

```
drop y01 n01
```

```
duplicates drop
```

```
* Calculate the VPC (via Leckie et al. 2020 method)
```

```
predict m7xbhat, xb
```

```
replace m7xbhat = m7xbhat - ln(n)
```

```
scalar m7sigma2u = _b[var(_cons[departo]):_cons]
```

```
generate m7mu = exp(m7xbhat + m7sigma2u/2)
```

```
generate m7vpc = ((m7mu^2) * (exp(m7sigma2u) - 1)) / ((m7mu^2) * (exp(m7sigma2u) - 1) +  
m7mu)
```

```
summarize m7vpc [fweight = n]
```

```
* VPC: Latent response formulation of mixed-effects logistic regression
```

```
meqrlogit y || departo:, binomial(n)
```

```
scalar m7logitsigma2u = exp(_b[lns1_1_1:_cons])^2
```

```
estat icc
```

```
*****
```

```
exit
```
